# Supplementary material for: Spontaneous Formation of MXene-Oxidized Sono/Chemo-Dynamic Sonosensitizer/Nanocatalyst for Antibacteria and Bone-Tissue Regeneration
Source: Research Square preprint supplement (doi:10.21203/rs.3.rs-2412598/v2), 2023-03-24
Supplement: Supplementary file 1 [file 98d34b9a371e2931a22af1b8.docx]

**Supplementary Information**

**Spontaneous Formation of MXene-Oxidized Sono/Chemo-Dynamic Sonosensitizer/Nanocatalyst for Antibacteria and Bone-Tissue Regeneration**

Yang Yu1,2,3**†**, Houyi Sun1**†**, Qunshan Lu1, Junyuan Sun1,3, Pengfei Zhang1,3, Linran Zeng4, Krasimir Vasilev5, Yunpeng Zhao1*, Yu Chen2*, Peilai Liu1*

1Department of Orthopaedics, Qilu Hospital of Shandong University, Jinan 250012, P. R. China

2Materdicine Lab, School of Life Sciences, Shanghai University, Shanghai 200444, P. R. China

3Laboratory of Basic Medical Sciences, Qilu Hospital of Shandong University, Jinan 250012, P. R. China.

4The 1st Affiliated Hospital of Kunming Medical University, Kunming Yunnan 650032, P. R. China

5 College of Medicine and Public Health, Flinders University, Sturt Road, Bedford Park South Australia, 5042, Australia

**†** These authors contribute equally.

***Corresponding authors**

Yunpeng Zhao, Yu Chen, Peilai Liu, Emails: lwwzyp@email.sdu.edu.cn (Prof. Y. Zhao); 199362000205@email.sdu.edu.cn (Prof. P. Liu); chenyuedu@shu.edu.cn (Prof. Y. Chen)

**Authors’ emails**

Yang Yu, gkyy1998@mail.sdu.edu.cn

Houyi Sun, 15051514605@163.com

Qunshan Lu, [luqunshan1112@163.com](mailto:luqunshan1112@163.com)

Junyuan Sun, 17621778576@163.com

Pengfei Zhang, pengfeizhang@mail.sdu.edu.cn

Linran Zeng, 147794316@qq.com

Krasimir Vasilev, krasimir.vasilev@flinders.edu.au

Yunpeng Zhao, lwwzyp@email.sdu.edu.cn

Yu Chen, chenyuedu@shu.edu.cn

Peilai Liu, 199362000205@email.sdu.edu.cn

**Supplementary figures**

**
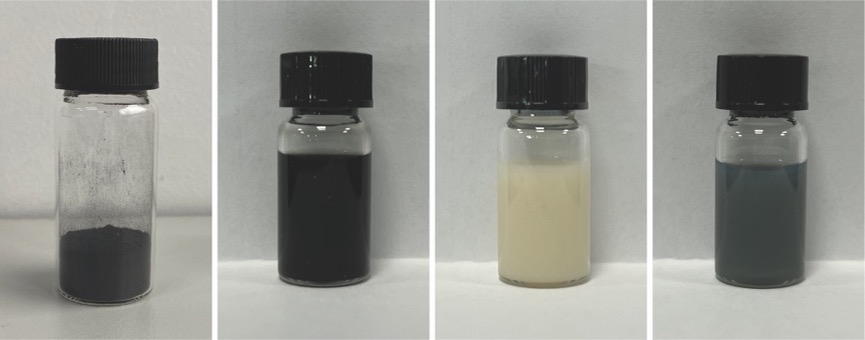
**

**Supplementary Figure 1.** Digital photographs of Ti3AlC2, Ti3C2 MXene, CaO2-PVP and CaO2-TiOx@Ti3C2 (C-T@Ti3C2).


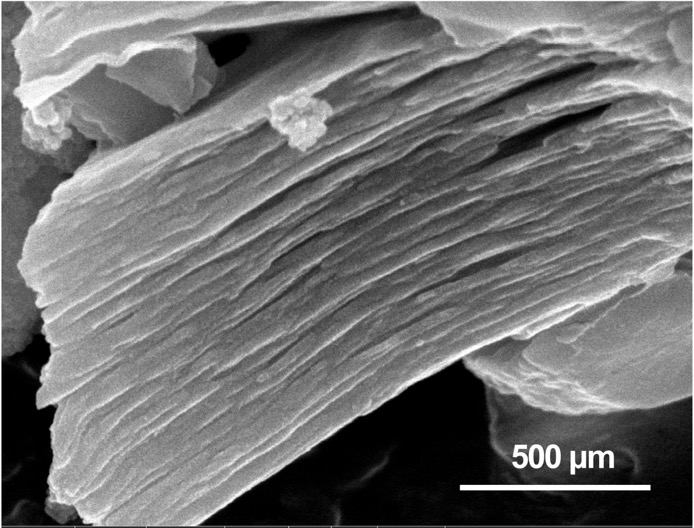


**Supplementary Figure 2.** SEM image of multilayered Ti3C2 MXene.


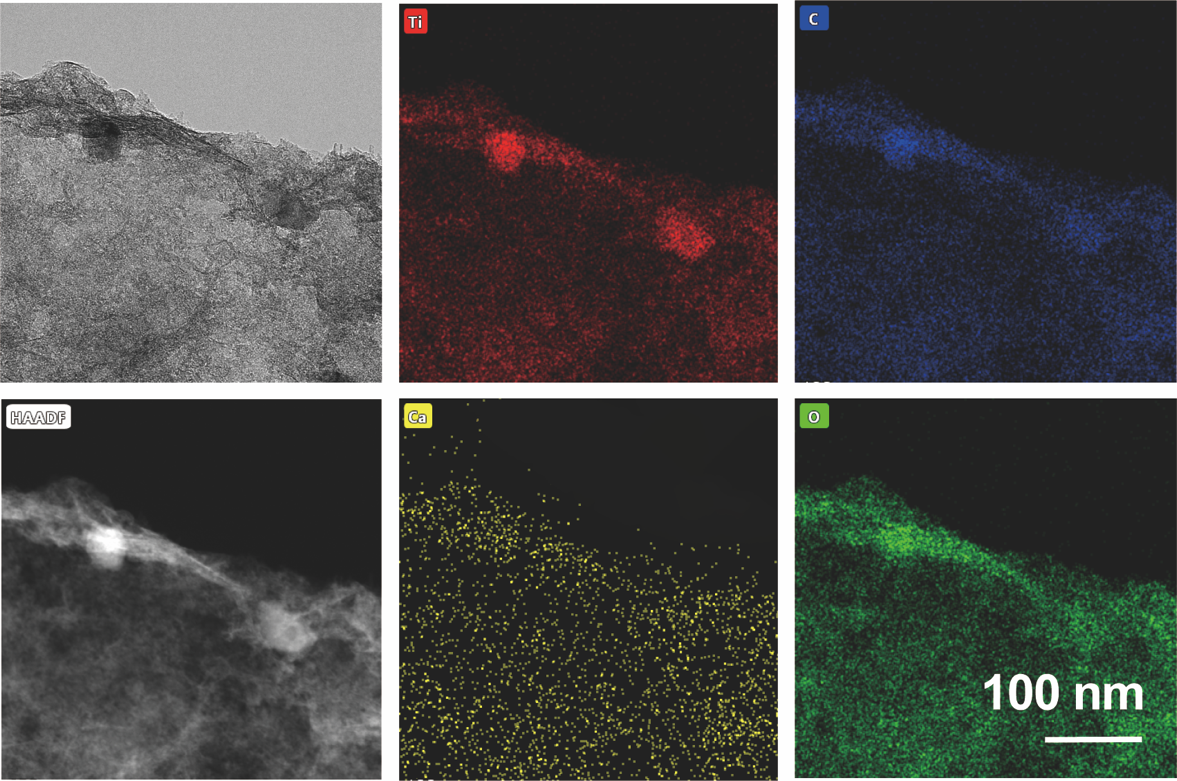


**Supplementary Figure 3.** TEM, dark-field STEM images and corresponding element mappings (for Ti, C, Ca and O) of C-T@Ti3C2 nanosheets.


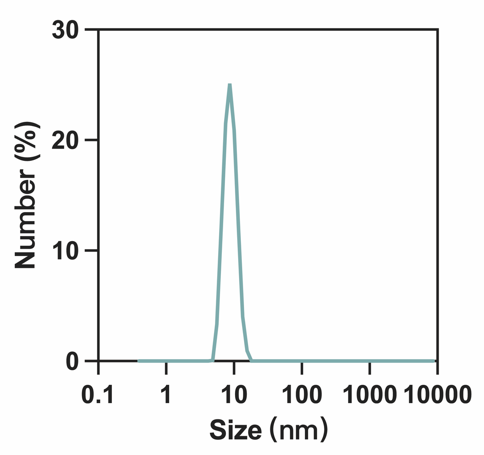


**Supplementary Figure 4.** DLS analysis of CaO2-PVP in water.


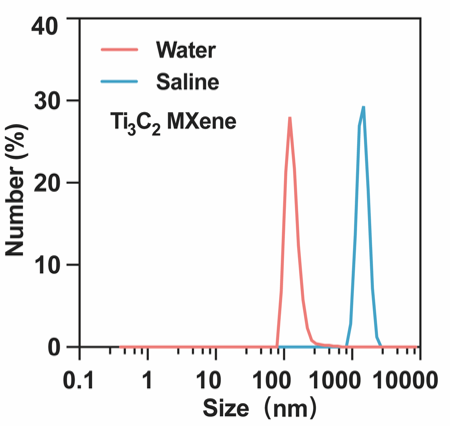


**Supplementary Figure 5.** DLS analysis for Ti3C2 MXene in water and saline.


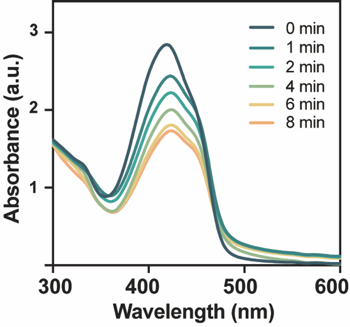


**Supplementary Figure 6.** UV‒vis absorption spectra of time-dependent DPBF degradation under US treatment.


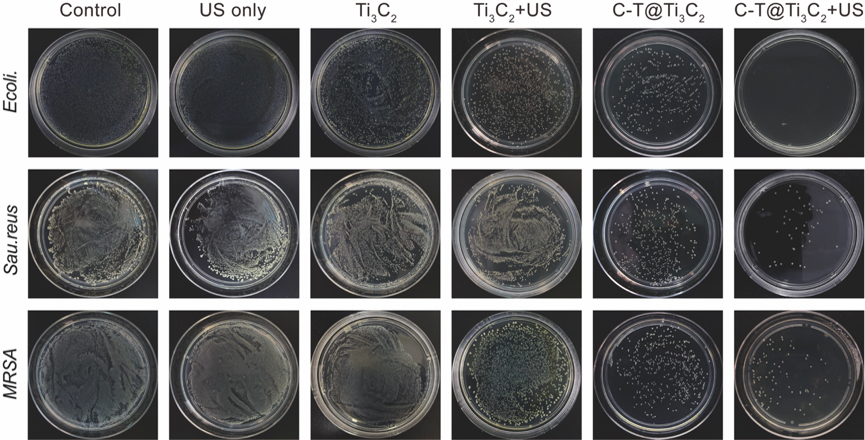


**Supplementary Figure 7.** Digital photos of spread plates containing *E. coli, S. aureus,* and *MRSA* with various treatments.


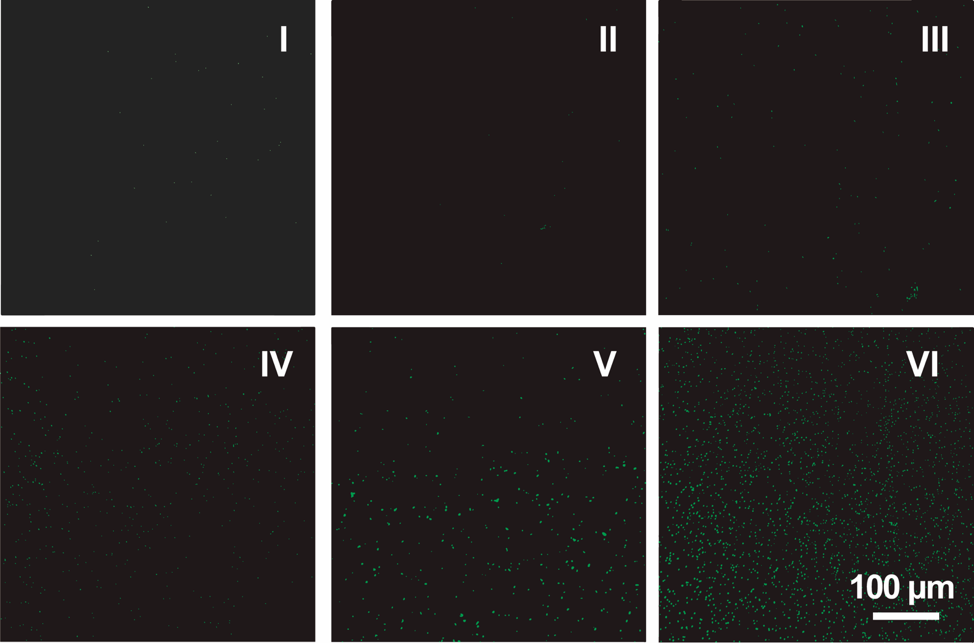


**Supplementary Figure 8.** Fluorescence microscopy images of MRSA stained with DCFH-DA after various treatments for ROS detection (I: Control group, II: US only group, III: Ti3C2 MXene group, IV: Ti3C2 MXene + US group, V: C-T@Ti3C2 group, VI: C-T@Ti3C2 + US group).


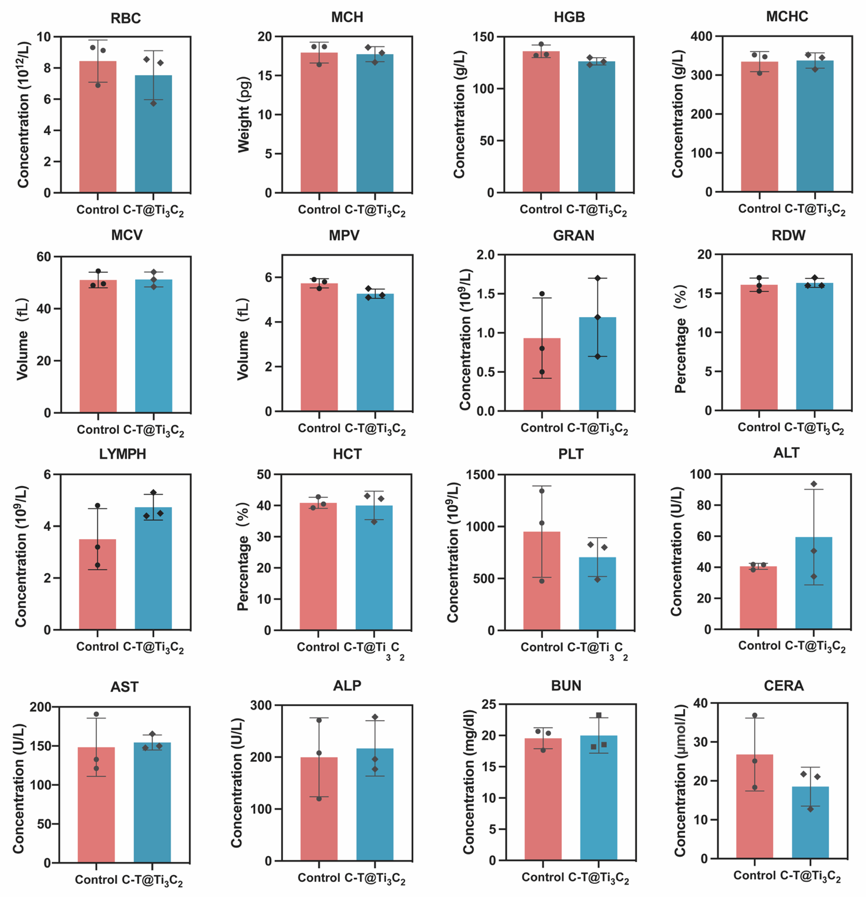


**Supplementary Figure 9.** Haematological index of C57BL/6JNifdc mice intravenously administered C-T@Ti3C2 nanonetwork dispersion for 14 d (n = 3). Data are presented as the mean SD. Routine blood parameters included red blood cells (RBCs), mean corpuscular haemoglobin (MCH), haemoglobin (HGB), mean corpuscular haemoglobin concentration (MCHC), mean corpuscular volume (MCV), mean platelet volume (MPV), number of neutrophils (GRAN), red cell distribution width (RDW), number of lymphocytes (LYMPH), haematocrit (HCT) and platelets (PLT). Biochemistry parameters included alanine transaminase (ALT), aspartate transaminase (AST), alkaline phosphatase (ALP), urea nitrogen (BUN), and creatinine (CREA).


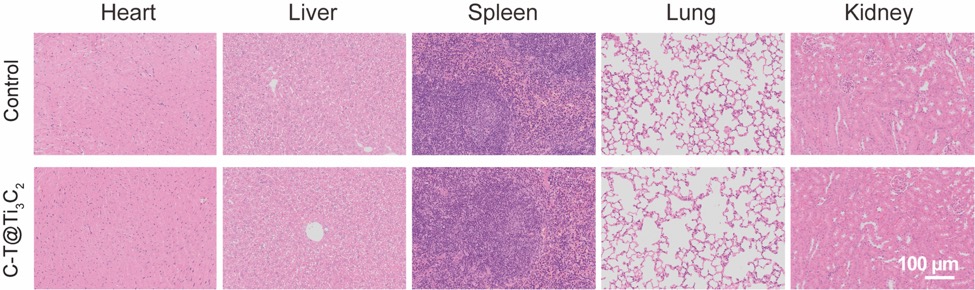


**Supplementary Figure 10.** Histological assessments of the major organs (heart, liver, spleen, lung and kidney) of C57BL/6JNifdc mice after intravenous injections with C-T@Ti3C2 nanonetworks for 14 d.


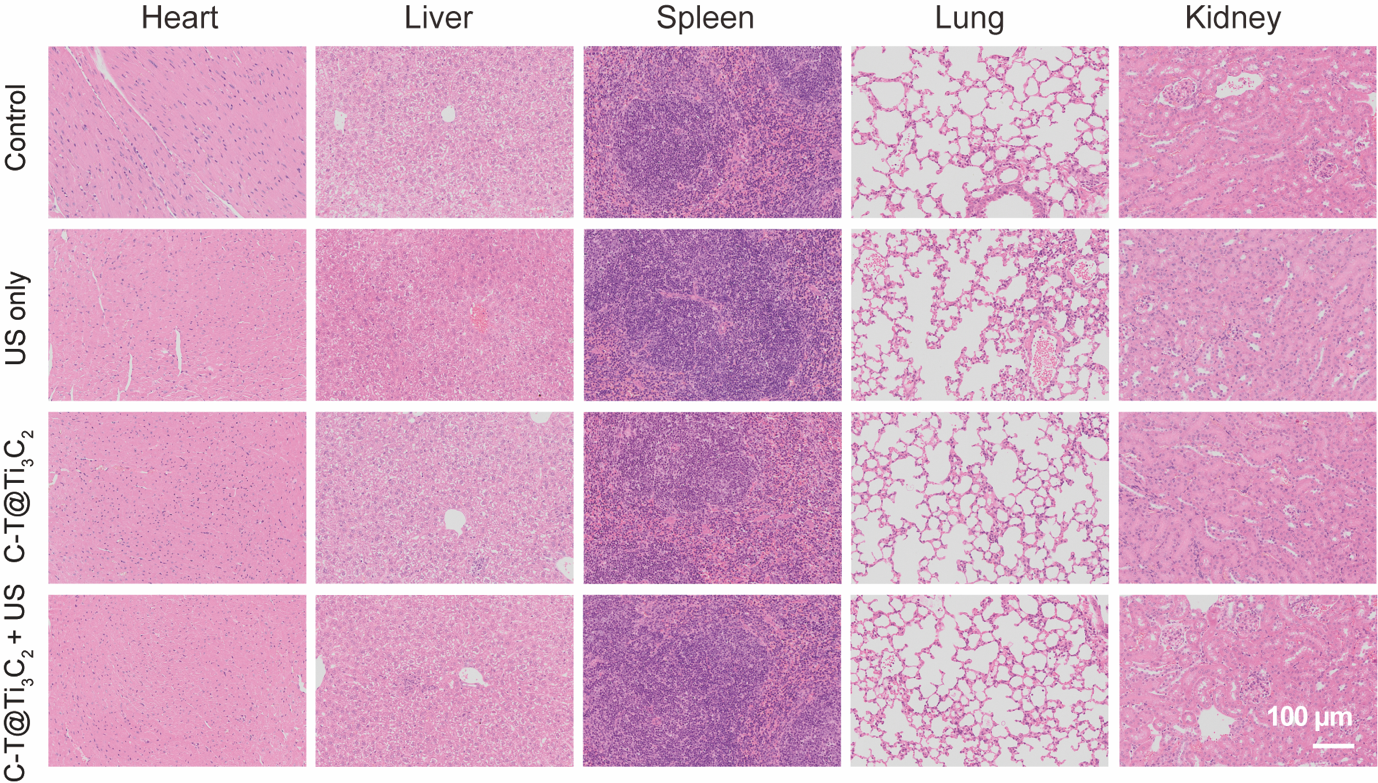


**Supplementary Figure 11.** Histological assessments of the major organs (heart, liver, spleen, lung and kidney) of C57BL/6JNifdc mice after different treatments in the MRSA-infected wound model.


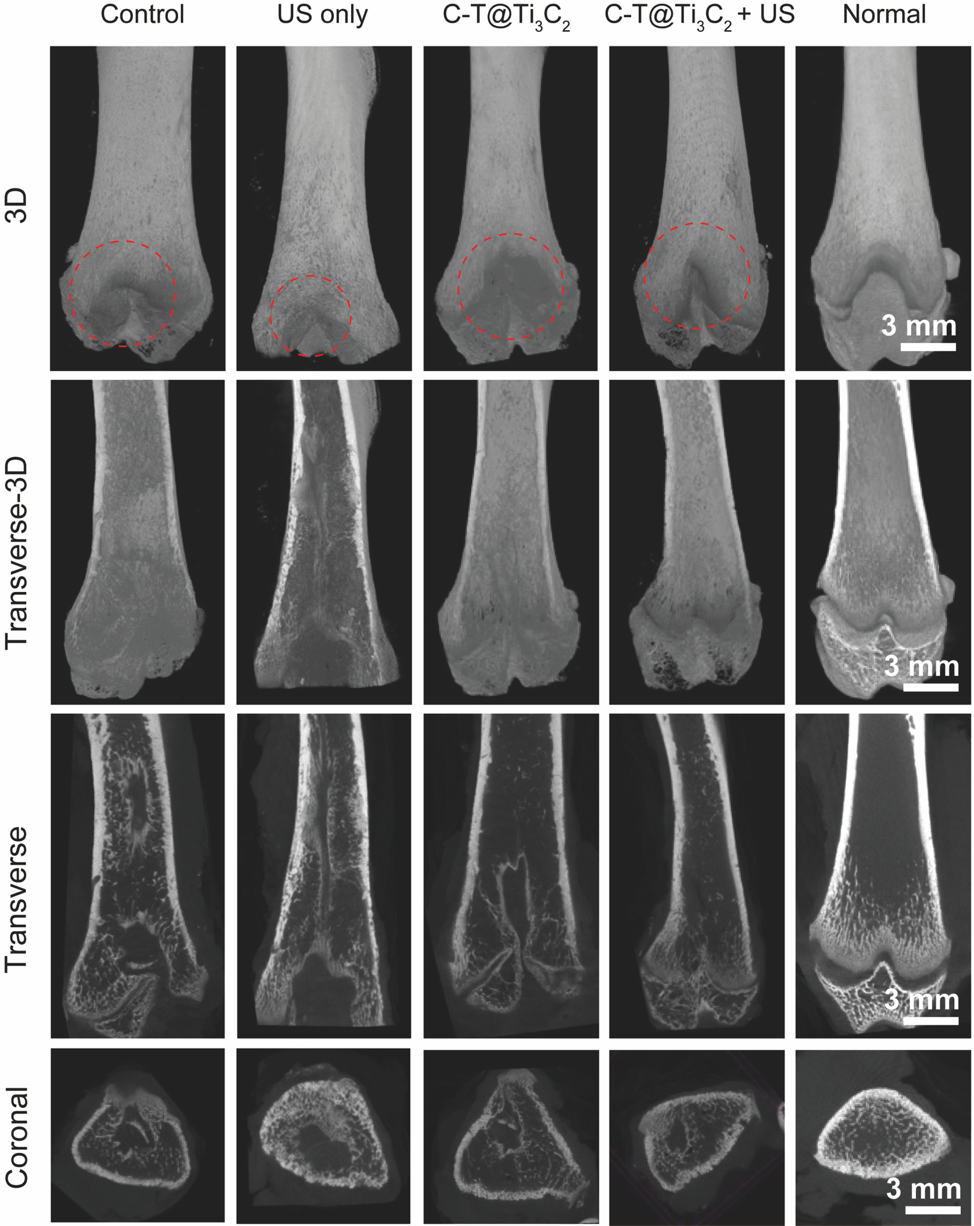


**Supplementary Figure 12.** Micro-CT images of femurs in different groups after 2 weeks of treatment.


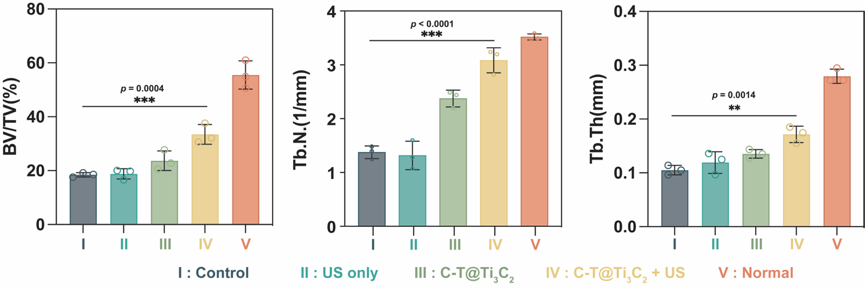


**Supplementary Figure 13.** Corresponding quantitative analysis showing BV/TV, Tb. Th and Tb.N. (n=3) in different groups after surgery for 2 weeks. Data are presented as the mean SD. Statistical significance was calculated with a two-tailed t test, **P*≤ 0.05, ***P* ≤ 0.01, ****P* ≤ 0.001.

**
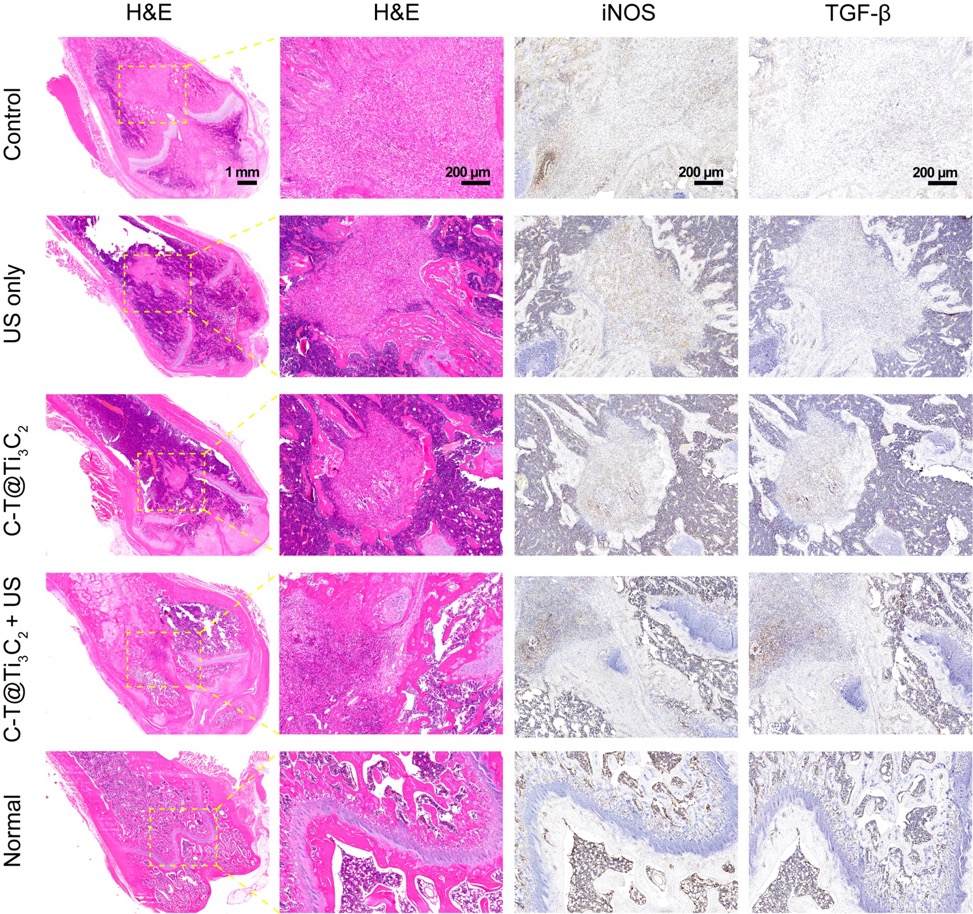
**

**Supplementary Figure 14.** Histological assessments (H&E staining, iNOS and TGF-β immunohistochemical staining) of bone tissue in different groups after 2 weeks of treatment.

**
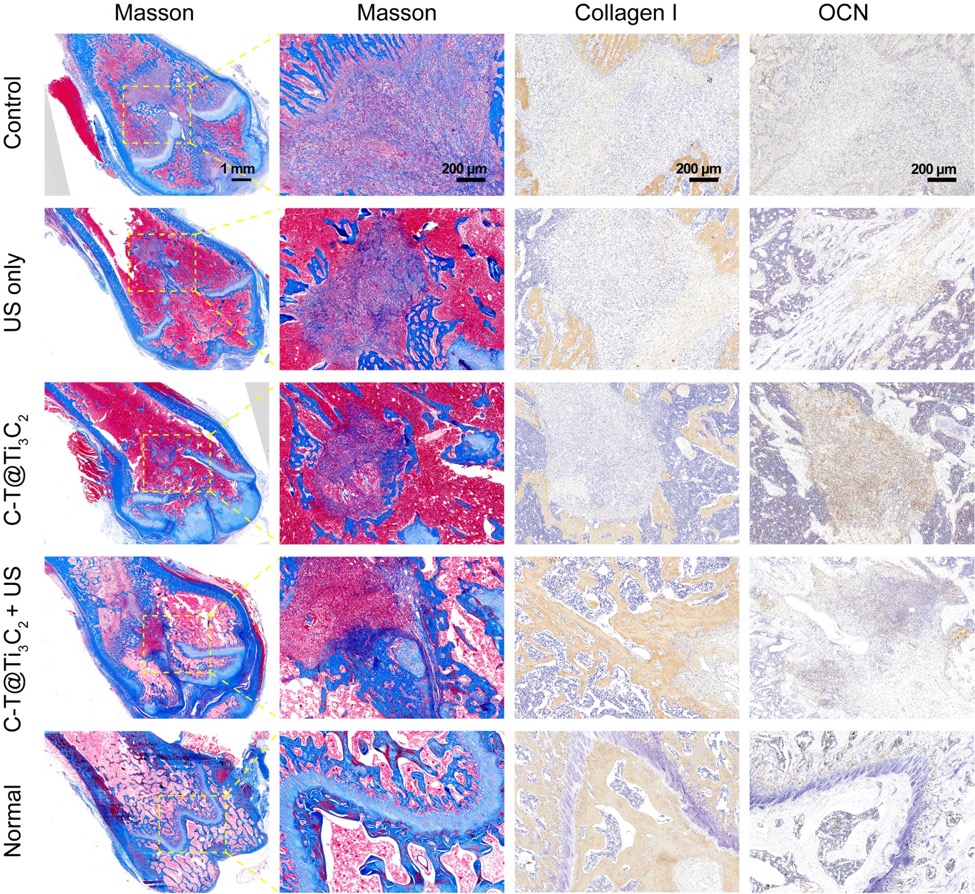
**

**Supplementary Figure 15.** Histological assessments (Masson staining, collagen I and OCN immunohistochemical staining) of the bone tissue in different groups after 2 weeks of treatment.


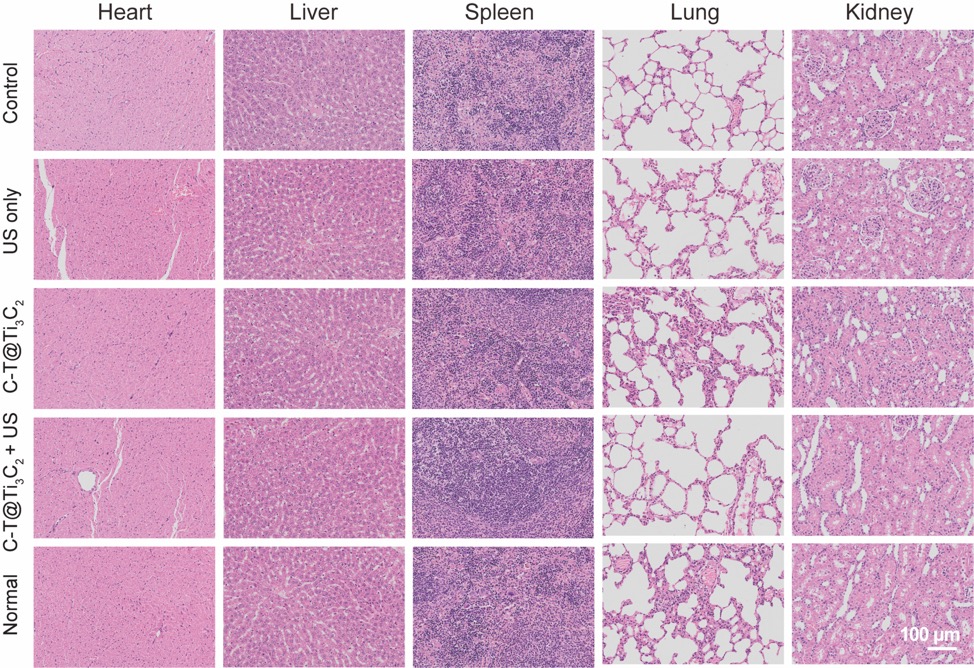


**Supplementary Figure 16.** Histological assessments of the major organs (heart, liver, spleen, lung and kidney) of SD rats from the bone defect model with MRSA infection at 2 weeks.


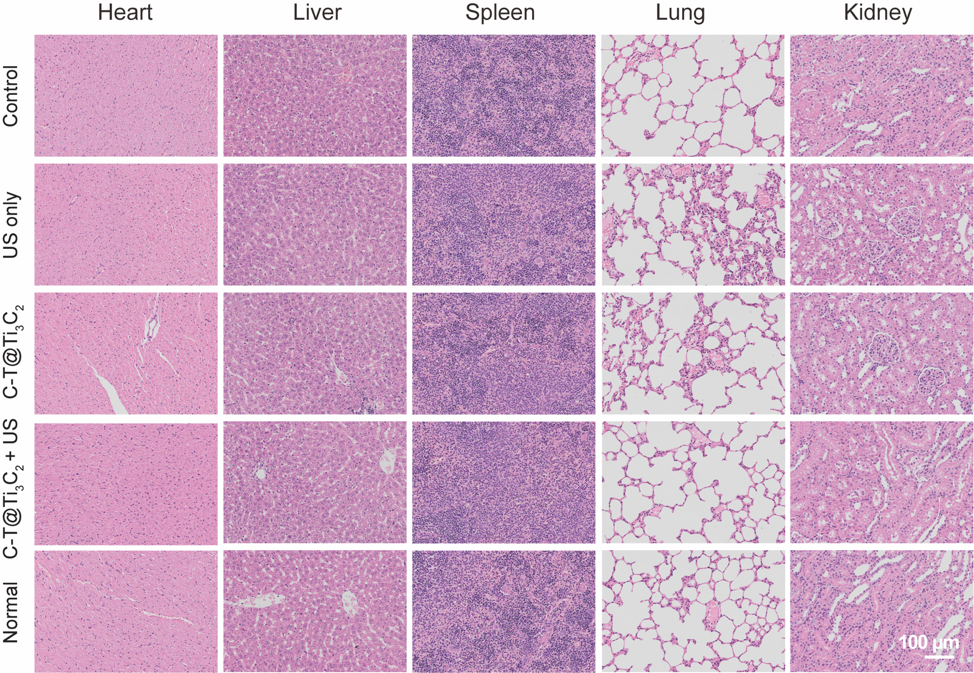


**Supplementary Figure 17.** Histological assessments of the major organs (heart, liver, spleen, lung and kidney) of SD rats from the bone defect model with MRSA infection at 4 weeks.
